# Supplementary material for: The Role of CXCR3 in DSS-Induced Colitis
Source: PubMed Central journal article supplement (PMC4081590; doi:10.1371/journal.pone.0101622), 2014-07-03
Supplement: pone.0101622.s001.pdf [file pone.0101622.s001.pdf]

# Supplemental Figures

## Data S1

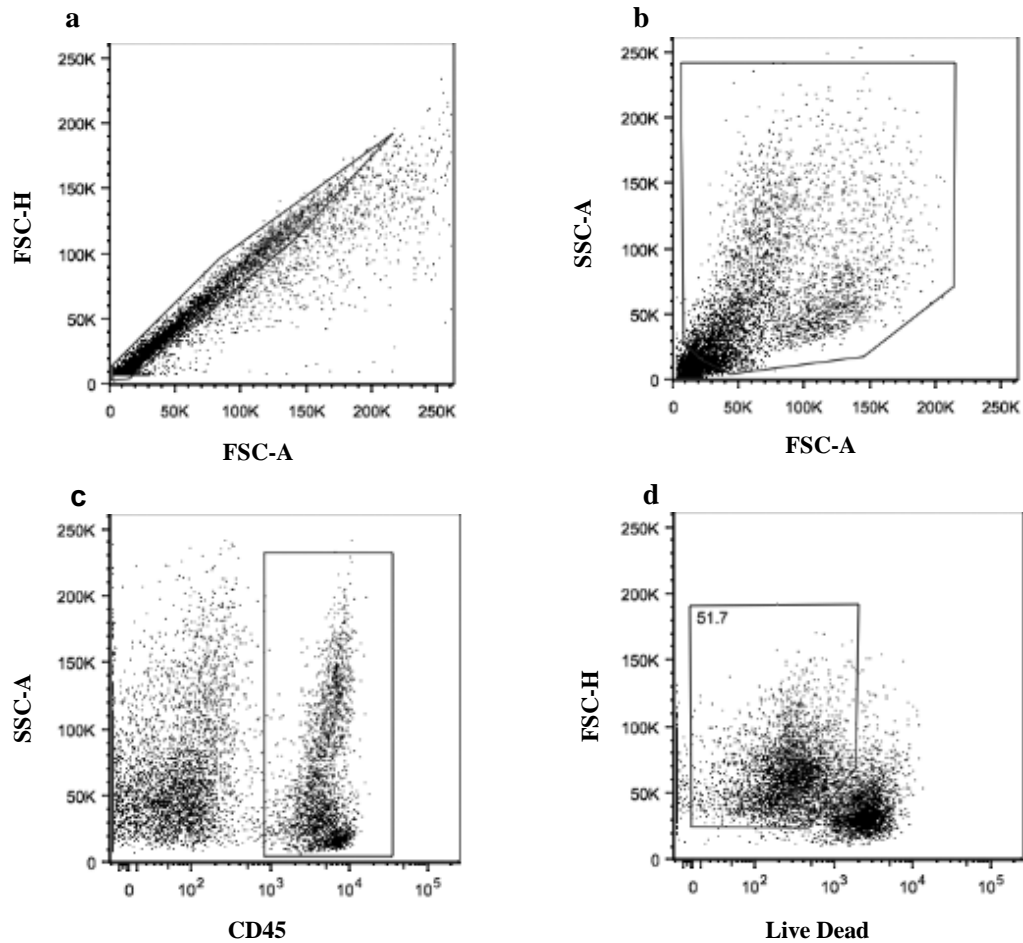

**Figure S1: Gating strategy used in flow cytometry experiments to determine the CD45+ leukocyte population in the colon of mice.** Representative flow cytometry dot plots showing **A)** gating for single cells isolated from the colon, **B)** gating to remove debris from the ‘single cell’ population, **C)** gating for leukocytes (CD45+) in the debris-free single-cell population, and **D)** gating for live cells in the CD45+ population. Analysis of cell surface markers CD45, CD4, Ly6G and F4/80 was performed after these initial gating strategies. Dot plots represent of 1 independent experiment with n=4 mice per group.

# Supplemental Figures

## Data S2

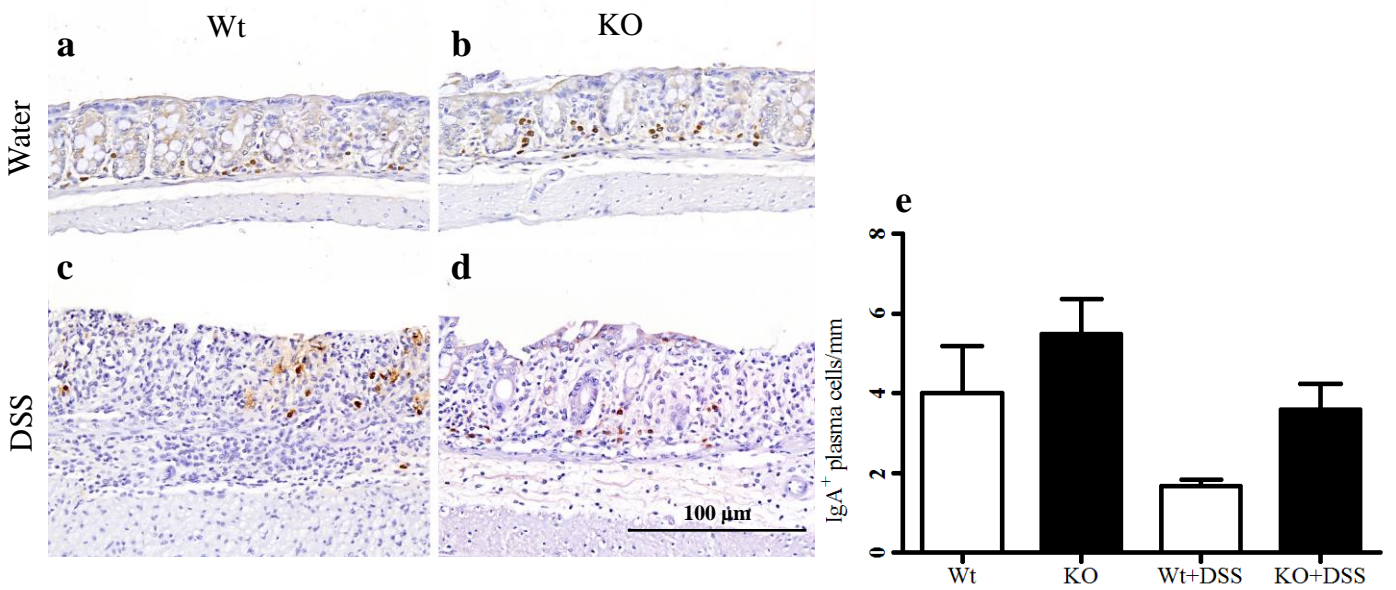

**Data S2. IgA colonic plasma cells in unchallenged or DSS-challenged Wt and KO mice.**

Representative labelling of IgA<sup>+</sup> plasma cells in water treated a) Wt and b) KO mice and DSS challenged c) Wt and d) mice, respectively. e) Enumeration of IgA<sup>+</sup> plasma cells in the colon following 9 days of either water or DSS challenge.

## Data S3

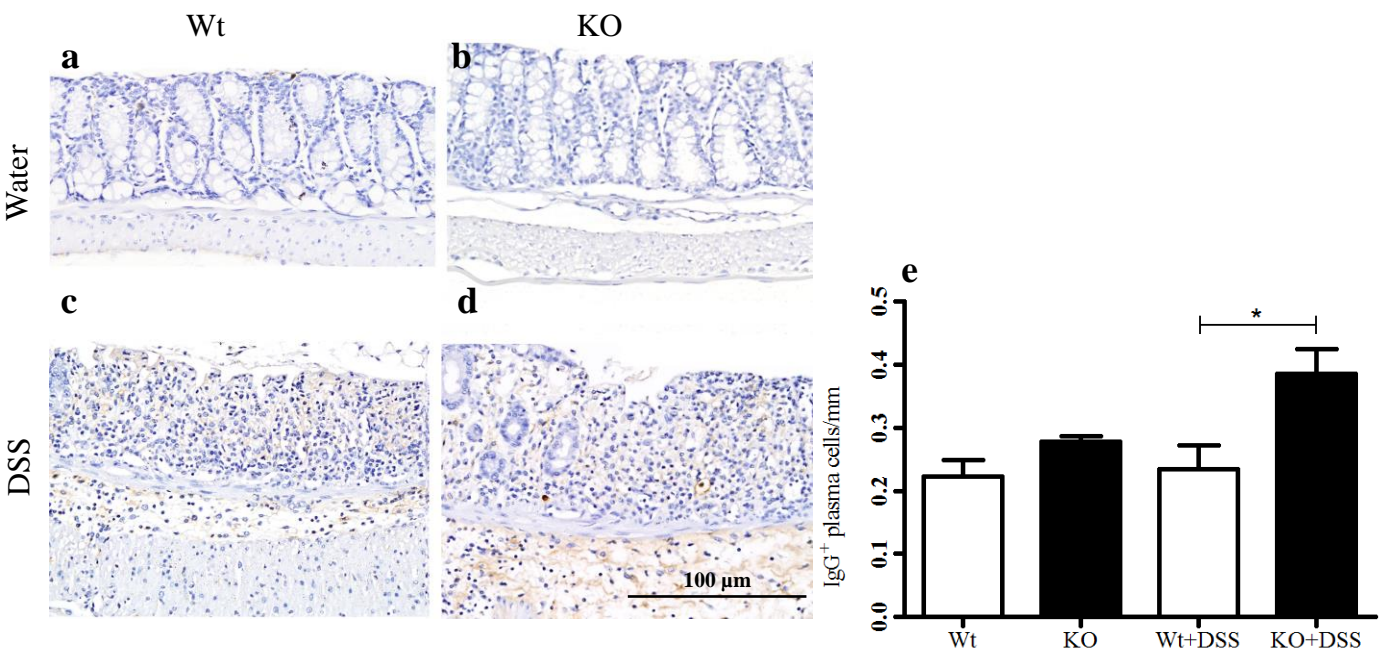

**Data S3. IgG colonic plasma cells in unchallenged or DSS-challenged Wt and KO mice.**

Representative labelling of IgG<sup>+</sup> plasma cells in water treated a) Wt and b) KO mice and DSS challenged c) Wt and d) mice, respectively. e) Enumeration of IgG<sup>+</sup> plasma cells in the colon following 9 days of either water or DSS challenge. \*  $p \leq 0.05$

# Supplemental Figures

## Data S4

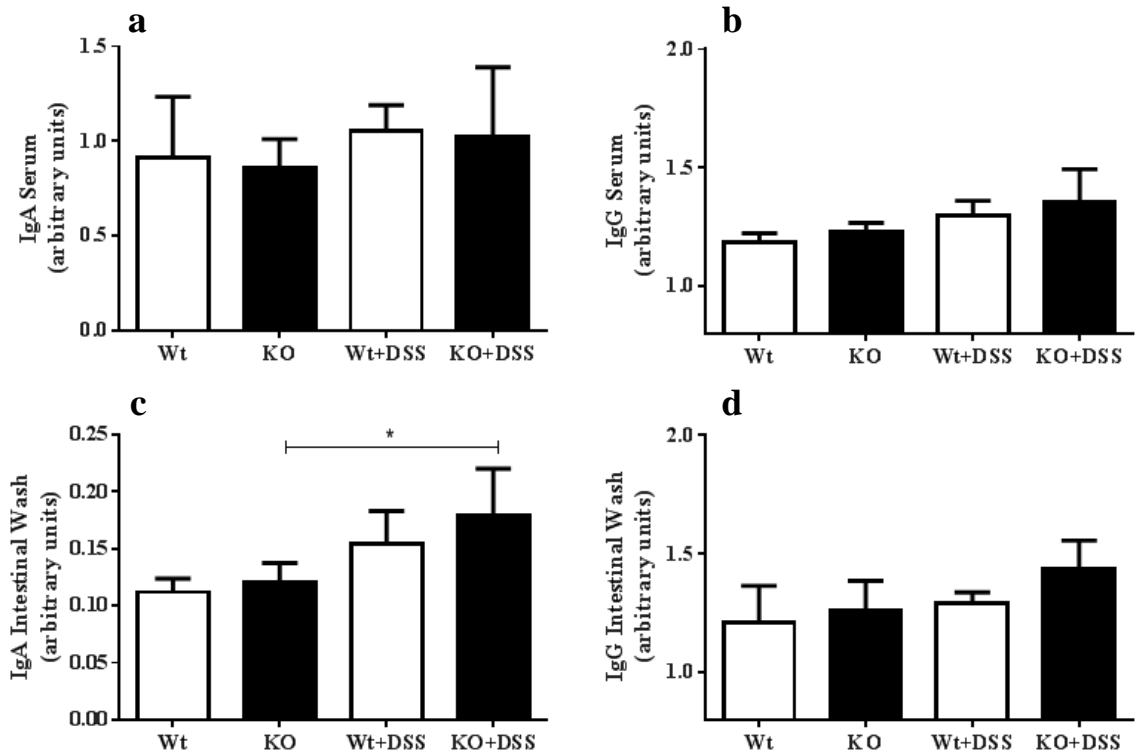

### Data S4. ELISA IgA and IgG measurement in serum and intestinal wash samples of

**unchallenged or DSS-challenged Wt and KO mice. IgA and IgG assayed in a-b) serum and c-d)**

intestinal wash samples in the colon following 9 days of either water or DSS challenge, respectively.\*

$p \leq 0.05$ . Briefly, sandwich ELISA was performed by coating plates with sheep anti-mouse Ig antibody

(1:200 v/v) overnight, followed by 1% skim milk block for 1 h at 37°C. Following this, samples were

incubated at room temperature for 1 h and wash before the detection antibody, rabbit anti-mouse IgA

or IgG (1:200 v/v) was added for an additional 1 h at room temperature. Following washing, anti-rabbit

Ig HRP (1:200 v/v) conjugated secondary was incubated for 30 min, washed and developed with

ABTS for 15-30 min. 1% SDS solution stop solution was added to the plate and the absorbance was

read with a spectrophotometer at 410nm. Data is presented in arbitrary units.

# Supplemental Figures

## Data S5

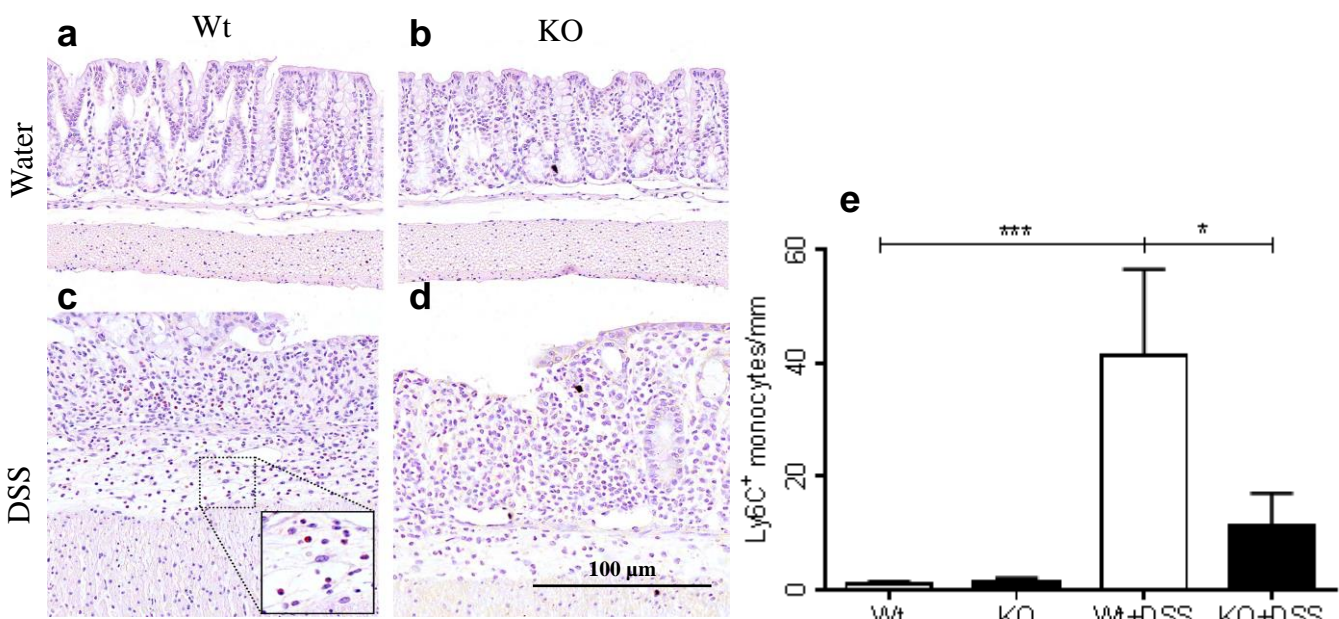

### Data S5. Ly6C<sup>+</sup> colonic monocytes in unchallenged

Representative labelling of Ly6C<sup>+</sup> cells in water treated a) Wt and b) KO mice and DSS challenged c)

Wt and d) KO mice, respectively. e) Enumeration of Ly6C<sup>+</sup> cells in the colon following 9 days of

either water or DSS challenge. \*  $p \leq 0.05$  & \*\*\*  $p \leq 0.0001$

## Data S6

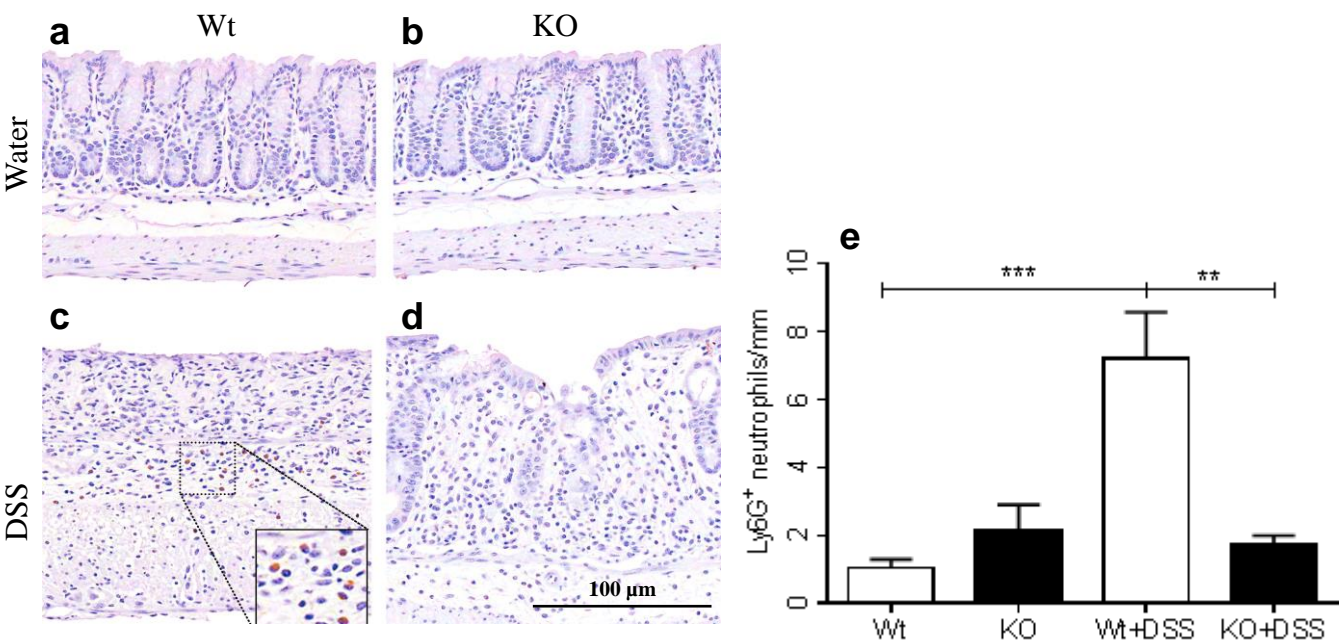

### Data S6. Ly6G<sup>+</sup> colonic neutrophils in unchallenged or DSS-challenged Wt and KO mice. a)

Representative labelling of Ly6G<sup>+</sup> cells in water treated a) Wt and b) KO mice and DSS challenged c)

Wt and d) KO mice, respectively. e) Enumeration of Ly6G<sup>+</sup> cells in the colon following 9 days of

either water or DSS challenge. \*  $p \leq 0.001$  & \*\*\*  $p \leq 0.0001$



# Supplemental Figures

## Data S7

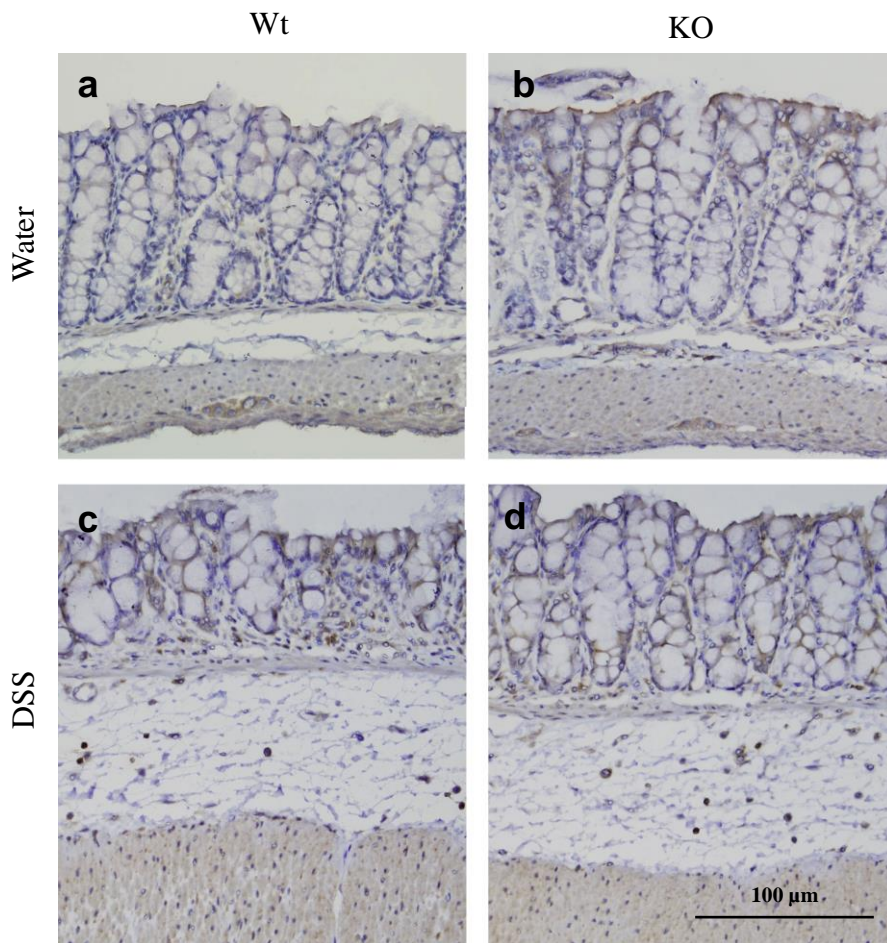

### Data S7. IL-17a<sup>+</sup> colonic T cells in unchallenged or DSS-challenged Wt and KO mice.

Representative labelling of IL-17a<sup>+</sup> cells in the submucosa of water treated **a)** Wt and **b)** KO mice and DSS challenged **c)** Wt and **d)** KO mice, respectively.
